# Supplementary material for: Evolution of the Membrane Transport Protein Domain
Source: MDPI journal article supplement (doi:10.3390/ijms23158094), 2022-07-22
Supplement: s1 [file s1]

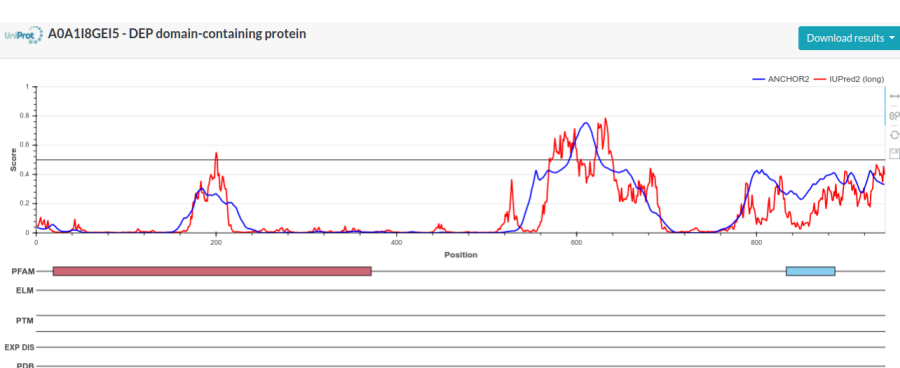

Protostomia

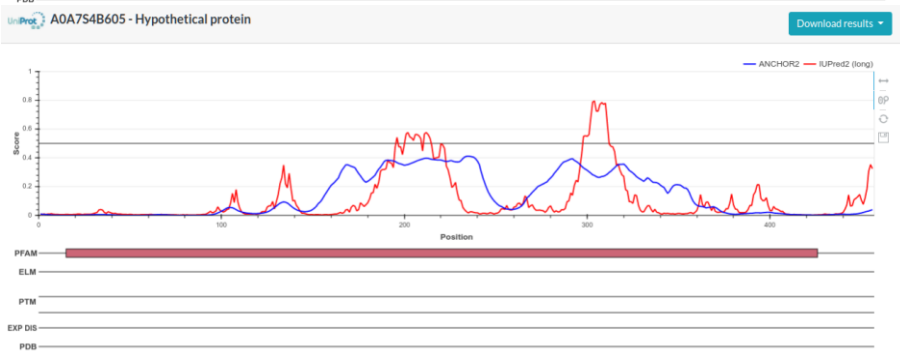

Haptista

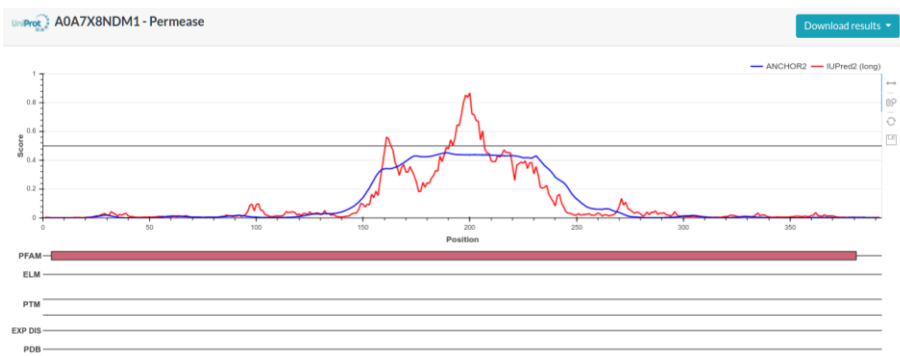

Terrabacteria,  
Actinobacteria

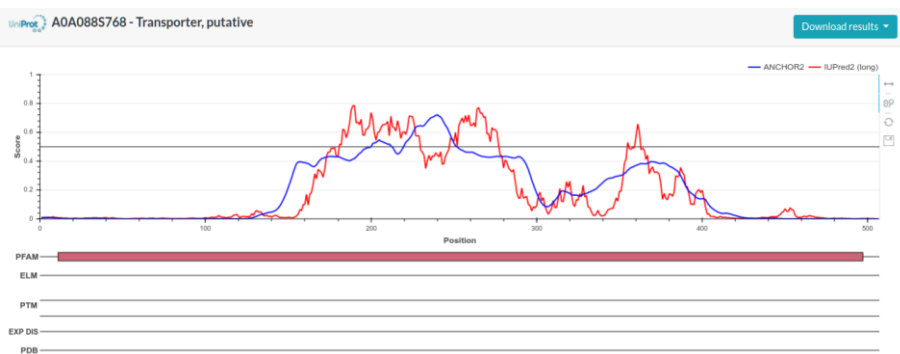

Discoba

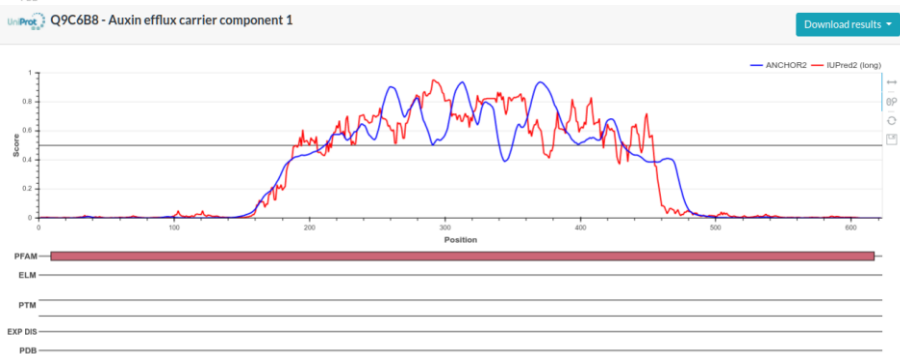

Streptophyta,  
Arabidopsis thaliana
